# Supplementary material for: Elemental imaging of leaves from the metal hyperaccumulating plant Noccaea caerulescens shows different spatial distribution of Ni, Zn and Cd
Source: Royal Society of Chemistry journal article supplement (doi:10.1039/c5ra23953b), 2015-12-22

### Electronic supplementary information 1

Leaf elemental concentrations in mg kg<sup>-1</sup> dry mass from each treatment and ecotype. Values represent the mean concentration from three biological replicates.

| Sample                | Ni  | Zn   | Cd  |
|-----------------------|-----|------|-----|
| Control Le Bleynard   | 0.9 | 1030 | 3.8 |
| Control Basadre       | 2.5 | 1060 | 11  |
| Control Prayon        | 0.7 | 650  | 8.9 |
| Control Bradford Dale |     |      |     |
| Dale                  | 1.1 | 870  | 1.2 |
| Cd Le Bleynard        | 160 | 1400 | 680 |
| Cd Basadre            | 8.4 | 1800 | 940 |
| Cd Prayon             | 0.6 | 1700 | 62  |
| Cd Bradford Dale      | 4.0 | 1700 | 520 |
| Ni Le Bleynard        | 380 | 1100 | 22  |
| Ni Basadre            | 870 | 1400 | 18  |
| Ni Prayon             | 77  | 810  | 25  |
| Ni Bradford Dale      | 740 | 1300 | 4.7 |
| Zn Le Bleynard        | 0.3 | 4000 | 21  |
| Zn Basadre            | 1.4 | 3500 | 7.9 |
| Zn Prayon             | 1.6 | 8000 | 5.5 |
| Zn Bradford Dale      | 2.2 | 2300 | 58  |

### Electronic supplementary information 2

Elemental image of the Zn treated Prayon ecotype. The full top section of the leaf (left hand side) was not collected. The same pattern can still be observed however with high concentrations of Zn in the leaf tip (left hand side).

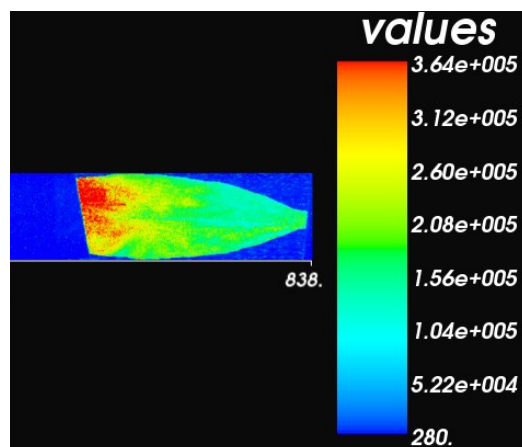

### Electronic supplementary information 3

Elemental analysis of the *N. caerulea* Bradford Dale population, grown hydroponically with four different Zn treatments. (A) The mean (n=10) concentration of Zn in dried leaves of *N. caerulea* with increasing Zn treatment; (B) the mean (n=10) concentration of Mn in the same leaves. Error bars represent standard deviation.

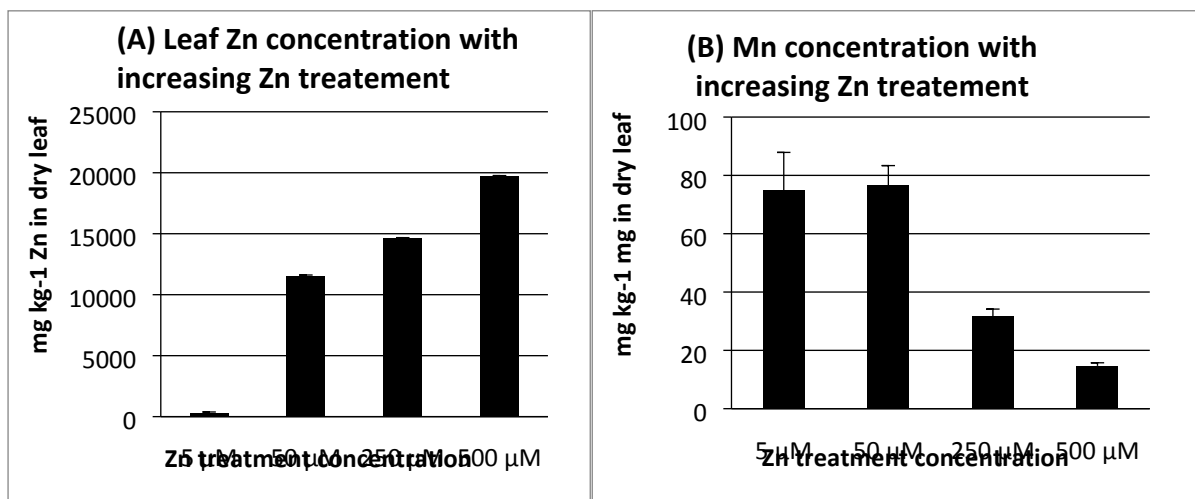

## Electronic supplementary information 4

Elemental images detected from *N. caerulescens* plants grown in giffy pots watered with normal nutrient media (control) or amended with 250  $\mu\text{M}$   $\text{Ni}^{2+}$ , 500  $\mu\text{M}$   $\text{Zn}^{2+}$  or 10  $\mu\text{M}$   $\text{Cd}^{2+}$ . Intensity bar on right of image, blue low intensity, red high intensity.

Leaf elemental images from control non-treated plants

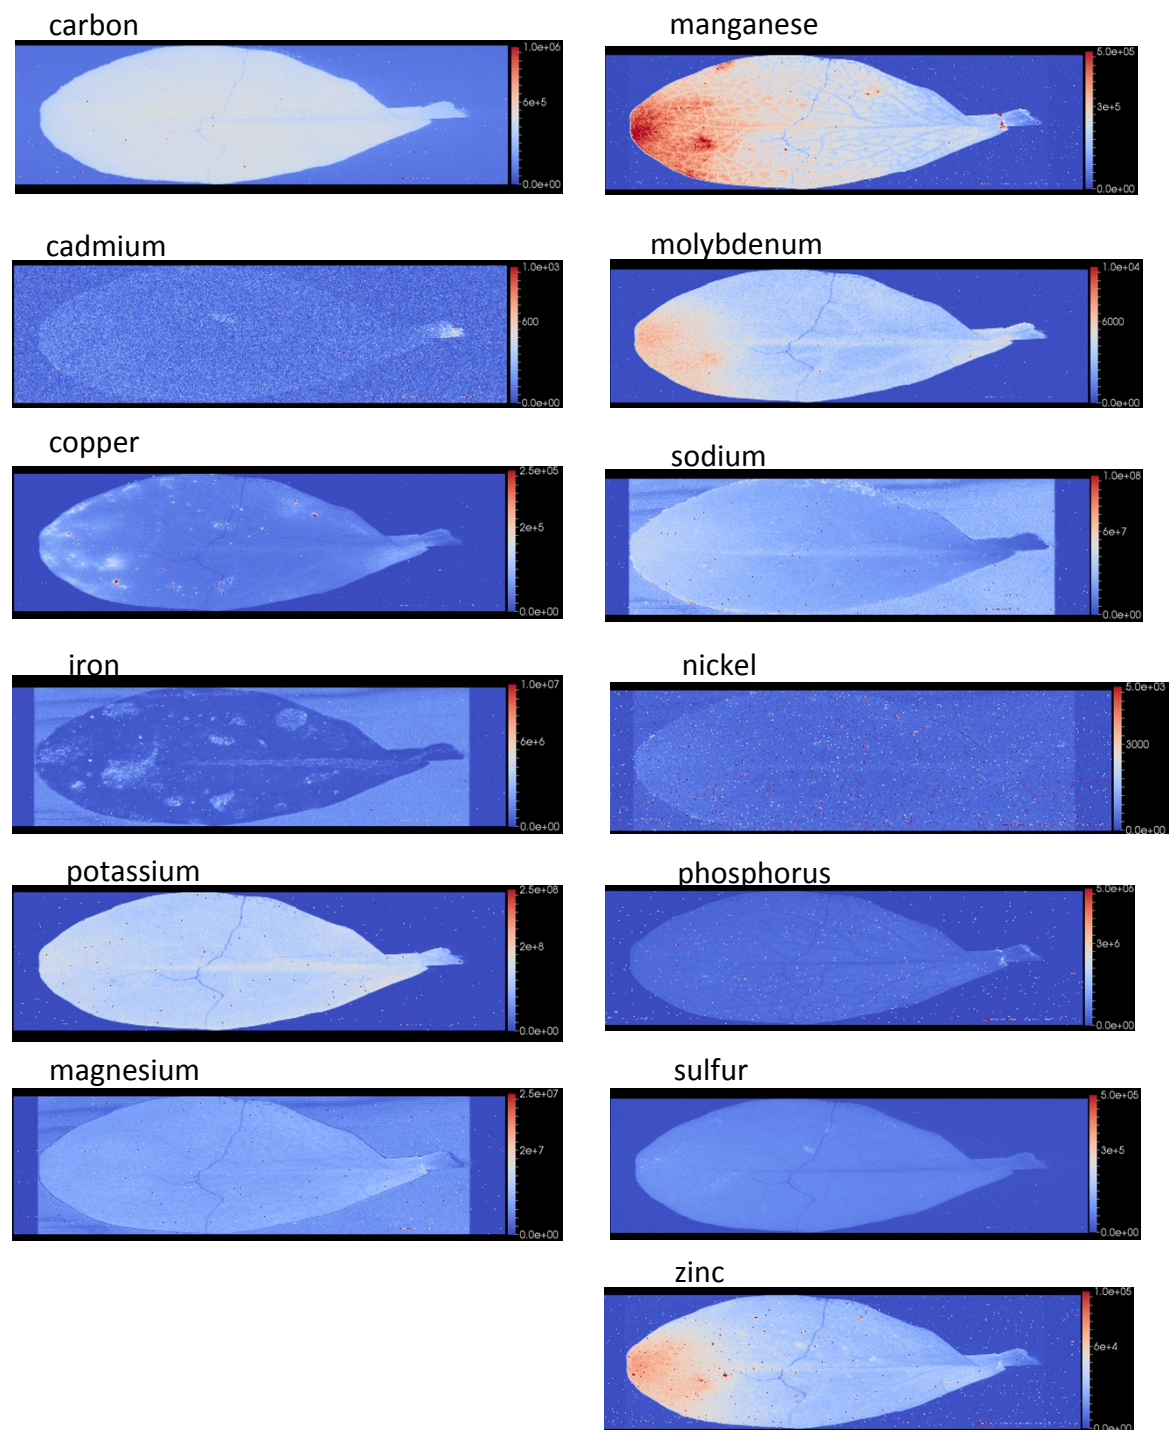

Leaf elemental images from zinc treated plant

carbon

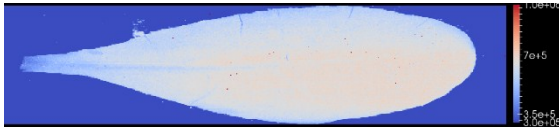

manganese

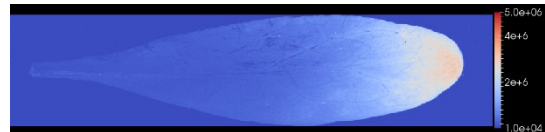

cadmium

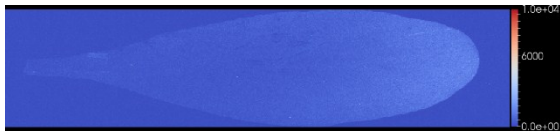

molybdenum

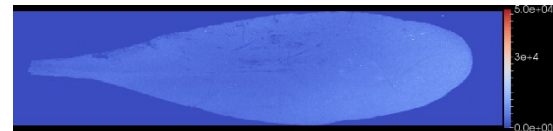

copper

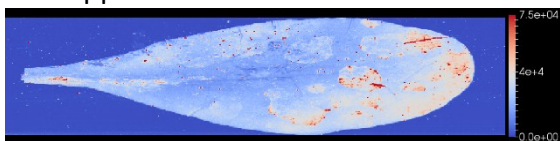

sodium

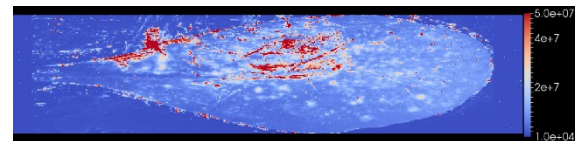

iron

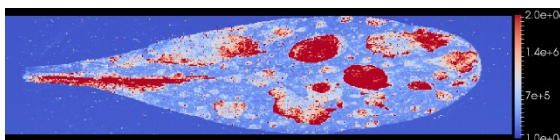

nickel

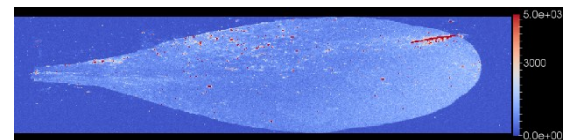

potassium

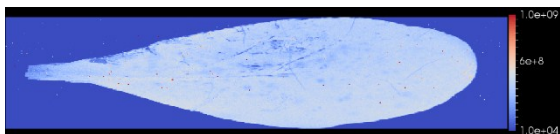

phosphorus

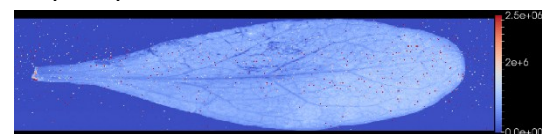

magnesium

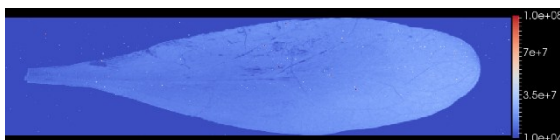

sulfur

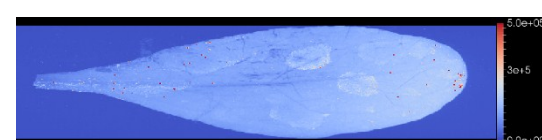

zinc

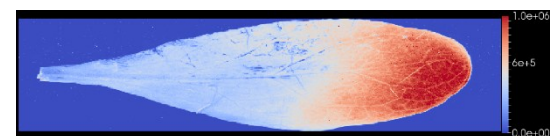

Leaf elemental images from nickel treated plant

carbon

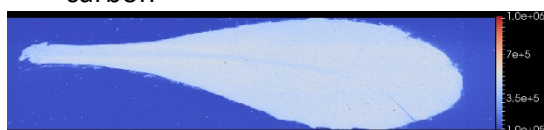

manganese

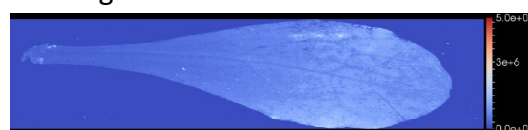

cadmium

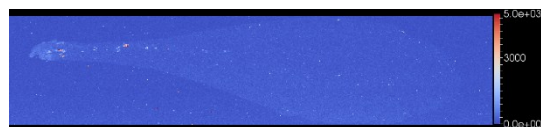

molybdenum

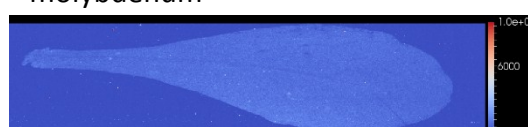

copper

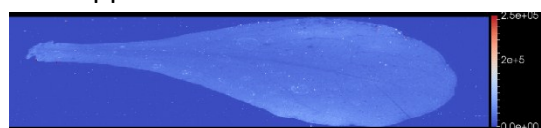

sodium

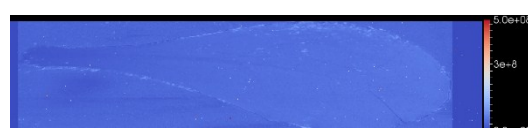

iron

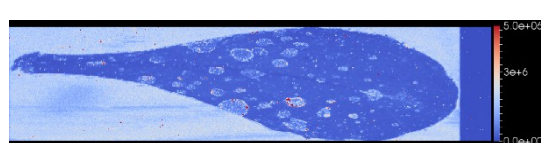

nickel

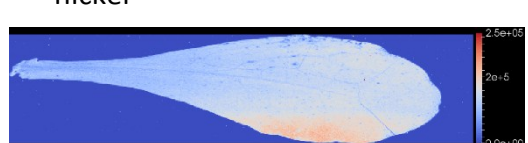

potassium

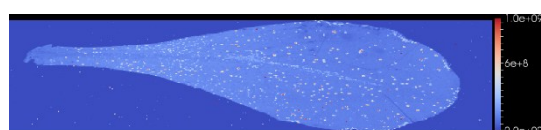

phosphorus

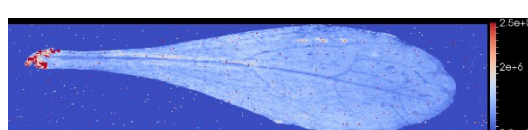

magnesium

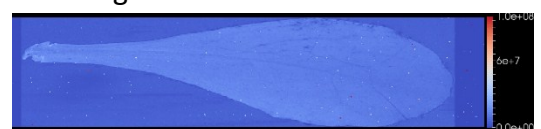

sulfur

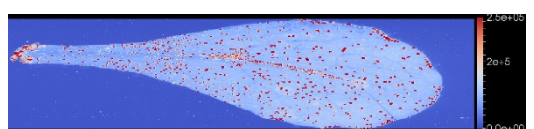

zinc

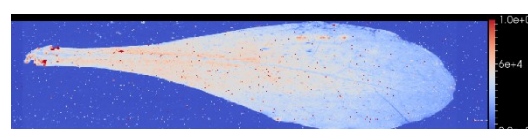



Leaf elemental images from cadmium treated plant

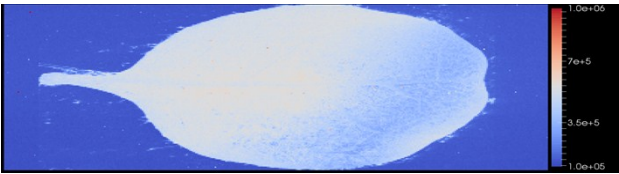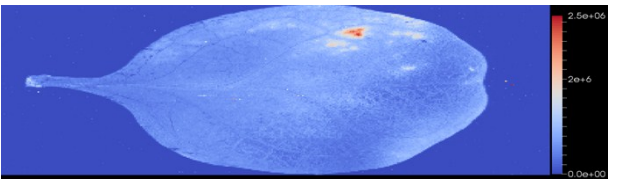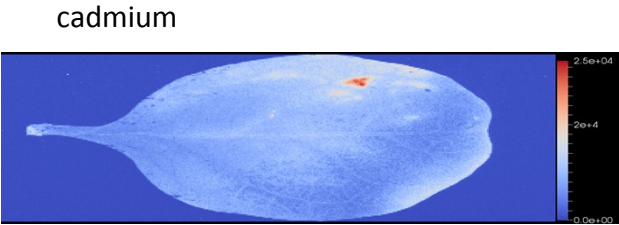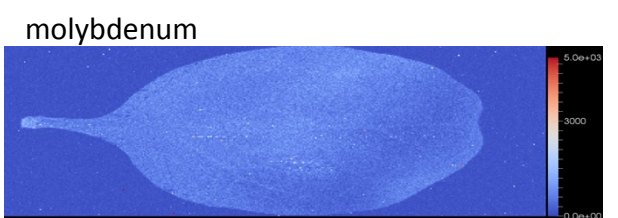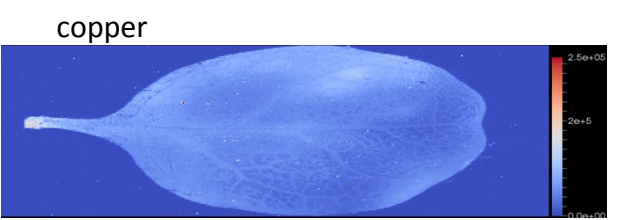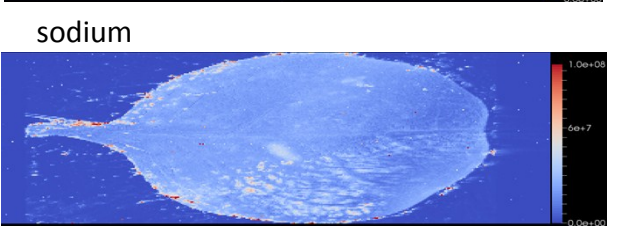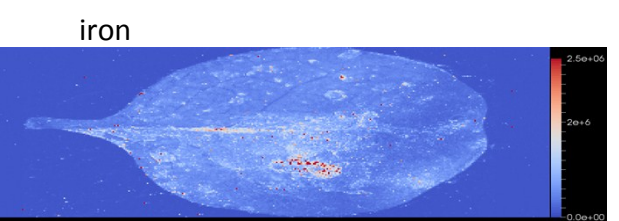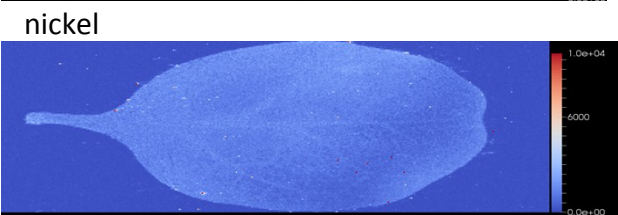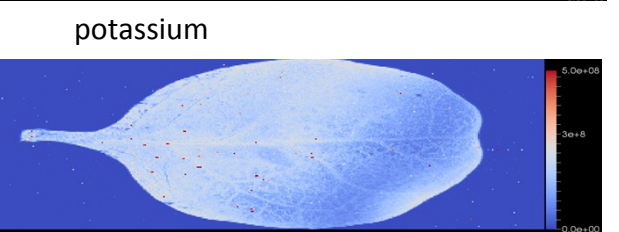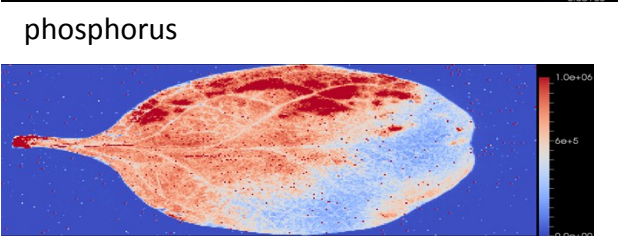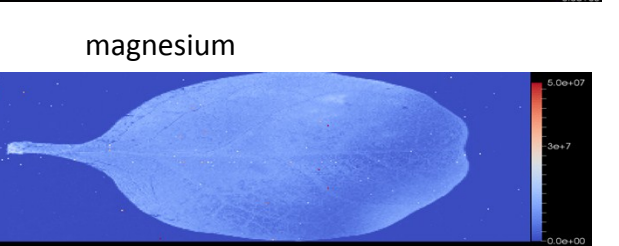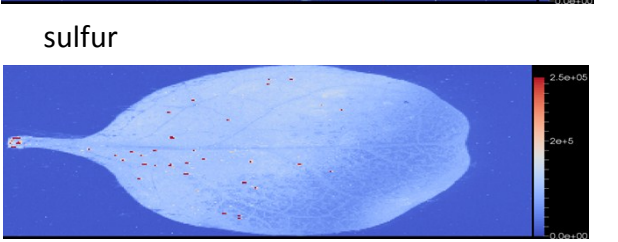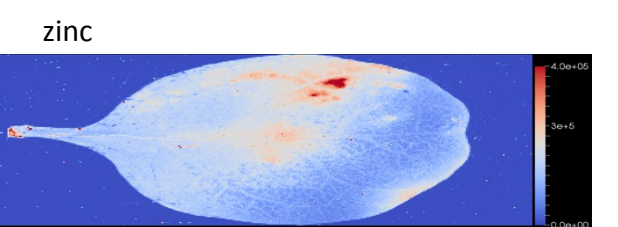

Supplement: c5ra23953b1.pdf [file c5ra23953b1.pdf]
